# Supplementary material
Source: publisher figshare collection journal article supplement (https://frontiersin.figshare.com/ndownloader/files/30663005)
Supplement: Supplementary file [file 30663005]

**Table S2.** Distribution of the main virulence factor-encoding genes between clonal and non-clonally-related *S. aureus* strains isolated at patient inclusion and follow-up.

|                  | <b>Clonal <i>S. aureus</i><br/>isolated at inclusion<br/>and during the follow-<br/>up<br/>(n=28 strains) (%)</b> | <b>Non-clonal <i>S. aureus</i><br/>isolated at inclusion<br/>and during the<br/>follow-up<br/>(n=82 strains) (%)</b> | <b><i>P</i>-value</b> |
|------------------|-------------------------------------------------------------------------------------------------------------------|----------------------------------------------------------------------------------------------------------------------|-----------------------|
| <i>sea</i>       | 6 (21.4)                                                                                                          | 28 (34.1)                                                                                                            | NS                    |
| <i>seb</i>       | 2 (7.1)                                                                                                           | 3 (3.7)                                                                                                              | NS                    |
| <i>sec</i>       | 6 (21.4)                                                                                                          | 9 (11.0)                                                                                                             | NS                    |
| <i>sed</i>       | 5 (17.9)                                                                                                          | 8 (9.8)                                                                                                              | NS                    |
| <i>seg</i>       | 15 (53.6)                                                                                                         | 42 (51.2)                                                                                                            | NS                    |
| <i>lukF/S-PV</i> | 0 (0)                                                                                                             | 0 (0)                                                                                                                | NS                    |
| <i>lukD/E</i>    | 19 (67.9)                                                                                                         | 41 (50.0)                                                                                                            | NS                    |
| <i>hla</i>       | 28 (100)                                                                                                          | 82 (100)                                                                                                             | NS                    |
| <i>hlb</i>       | 15 (53.6)                                                                                                         | 56 (68.3)                                                                                                            | NS                    |
| <i>sak</i>       | 17 (60.7)                                                                                                         | 53 (64.6)                                                                                                            | NS                    |
| <i>chp</i>       | 19 (67.9)                                                                                                         | 58 (70.7)                                                                                                            | NS                    |
| <i>scn</i>       | 23 (82.1)                                                                                                         | 73 (89.0)                                                                                                            | NS                    |
| <i>tst</i>       | 0 (0)                                                                                                             | 12 (14.6)                                                                                                            | 0.034                 |
| <i>etA</i>       | 0 (0)                                                                                                             | 1 (1.2)                                                                                                              | NS                    |
| <i>etB</i>       | 0 (0)                                                                                                             | 0 (0)                                                                                                                | NS                    |
| <i>etD</i>       | 2 (7.1)                                                                                                           | 3 (3.7)                                                                                                              | NS                    |
| <i>edinA</i>     | 0 (0)                                                                                                             | 0 (0)                                                                                                                | NS                    |
| <i>edinB</i>     | 2 (7.1)                                                                                                           | 3 (3.7)                                                                                                              | NS                    |
| <i>edinC</i>     | 0 (0)                                                                                                             | 0 (0)                                                                                                                | NS                    |
| <i>splA/B</i>    | 19 (67.9)                                                                                                         | 42 (51.2)                                                                                                            | NS                    |
| <i>agrI</i>      | 18 (64.3)                                                                                                         | 49 (59.8)                                                                                                            | NS                    |
| <i>agrII</i>     | 10 (35.7)                                                                                                         | 17 (20.7)                                                                                                            | NS                    |
| <i>agrIII</i>    | 0 (0)                                                                                                             | 14 (17.1)                                                                                                            | 0.019                 |
| <i>agrIV</i>     | 2 (7.1)                                                                                                           | 2 (2.4)                                                                                                              | NS                    |
| <i>cap5</i>      | 15 (53.6)                                                                                                         | 49 (59.8)                                                                                                            | NS                    |
| <i>cap8</i>      | 13 (46.4)                                                                                                         | 33 (40.2)                                                                                                            | NS                    |
| <i>bbp</i>       | 23 (82.1)                                                                                                         | 69 (84.1)                                                                                                            | NS                    |
| <i>clfA/B</i>    | 28 (100)                                                                                                          | 82 (100)                                                                                                             | NS                    |
| <i>fnbpA/B</i>   | 28 (100)                                                                                                          | 82 (100)                                                                                                             | NS                    |

Statistical analysis was performed using the Fisher's exact test. *P*-values <0.01 were considered as significant. NS, not significant.
